# Supplementary material for: 177Lu-OPS201 targeting somatostatin receptors: in vivo biodistribution and dosimetry in a pig model
Source: Springer Nature journal article supplement (doi:10.1186/s13550-016-0204-9), 2016-06-13
Supplement: MOESM1 [file 10245154]

# **$^{177}\text{Lu}$ -OPS201 Targeting Somatostatin Receptors: In Vivo Biodistribution and Dosimetry in a Pig Model**

## **Supplementary file**

Beykan Seval<sup>1</sup>, Dam Jan S.<sup>2</sup>, Eberlein Uta<sup>1</sup>, Kaufmann Jens<sup>3</sup>, Kjærgaard Benedict<sup>4</sup>, Jødal Lars<sup>2</sup>, Bouterfa Hakim<sup>3</sup>, Bejot Romain<sup>3</sup>, Lassmann Michael<sup>1</sup>, Jensen Svend Borup<sup>2,5</sup>

1: Department of Nuclear Medicine, University of Würzburg, Würzburg, Germany

2: Department of Nuclear Medicine, Aalborg University Hospital, Denmark

3: Octreopharm Science GmbH, Berlin, Germany

4: Biomedical Research Laboratory, Department of Clinical Medicine, Aalborg University Hospital  
Denmark

5: Department of Chemistry and Biochemistry, Aalborg University, DK-9000 Aalborg, Denmark

Supplementary Table 1. Radioactivity in whole blood and plasma

Animal IA: OG-20140920-P1

| Time post dosing (min) | Whole blood |          | Plasma |          |
|------------------------|-------------|----------|--------|----------|
|                        | Bq/mL*      | %IA/mL** | Bq/mL* | %IA/mL** |
| 1.40                   | 16156       | 0.01517  | 22058  | 0.02072  |
| 2.15                   | 13592       | 0.01277  | 17445  | 0.01638  |
| 3.00                   | 10943       | 0.01028  | 14867  | 0.01396  |
| 5.00                   | 7720        | 0.00725  | 10170  | 0.00955  |
| 10.02                  | 4628        | 0.00435  | 6110   | 0.00574  |
| 20.03                  | 2684        | 0.00252  | 3712   | 0.00349  |
| 30.17                  | 1950        | 0.00184  | 2787   | 0.00262  |
| 50.03                  | 1400        | 0.00132  | 1937   | 0.00183  |
| 75.16                  | 1054        | 0.00100  | 1389   | 0.00131  |
| 99.5                   | 884         | 0.00084  | 1173   | 0.00111  |
| 200.1                  |             |          | 744    | 0.00071  |
| 300.0                  | 396         | 0.00038  | 528    | 0.00051  |
| 3180                   | 84          | 0.00010  | 134    | 0.00016  |
| 6060                   | 58          | 0.00009  | 94     | 0.00014  |
| 8892                   | 29          | 0.00005  | 54     | 0.00010  |
| 17610                  | 4           | 0.00001  | 9      | 0.00003  |

Animal IA: OG-20140920-P2

| Time post dosing (min) | Whole blood |          | Plasma |          |
|------------------------|-------------|----------|--------|----------|
|                        | Bq/mL*      | %IA/mL** | Bq/mL* | %IA/mL** |
| 1.18                   | 24986       | 0.02443  | 39017  | 0.03815  |
| 1.22                   | 20887       | 0.02078  | 32837  | 0.03266  |
| 3.20                   | 12499       | 0.01243  | 18324  | 0.01823  |
| 5.05                   | 9373        | 0.00933  | 13686  | 0.01362  |
| 10.05                  | 5494        | 0.00547  | 8304   | 0.00827  |
| 20.00                  | 3153        | 0.00314  | 4860   | 0.00484  |
| 30.10                  | 2278        | 0.00227  | 3484   | 0.00347  |
| 50.00                  | 1686        | 0.00168  | 2340   | 0.00234  |
| 75.02                  | 1193        | 0.00119  | 1834   | 0.00183  |
| 100.05                 | 939         | 0.00094  | 1426   | 0.00143  |
| 200.05                 | 659         | 0.00067  | 1027   | 0.00104  |
| 300.0                  | 498         | 0.00051  | 672    | 0.00068  |
| 3030                   | 101         | 0.00012  | 162    | 0.00020  |
| 5910                   | 64          | 0.00010  | 99     | 0.00015  |
| 8730                   | 37          | 0.00007  | 62     | 0.00012  |
| 17400                  | 6           | 0.00002  | 13     | 0.00005  |

\* decay-corrected to the time of sampling

\*\* %IA/mL denotes percentage injected activity per volume of blood

Animal IA: OG-20140920-P3

| Time post dosing (min) | Whole blood |          | Plasma |          |
|------------------------|-------------|----------|--------|----------|
|                        | Bq/mL*      | %IA/mL** | Bq/mL* | %IA/mL** |
| 0.35                   | 42509       | 0.04030  | 55934  | 0.05302  |
| 1.22                   | 35041       | 0.03322  | 48037  | 0.04554  |
| 2.13                   | 26473       | 0.02510  | 36024  | 0.03415  |
| 5.00                   | 16265       | 0.01542  | 21724  | 0.02060  |
| 10.34                  | 10020       | 0.00951  | 13555  | 0.01286  |
| 19.56                  | 6587        | 0.00625  | 9026   | 0.00857  |
| 29.44                  | 4965        | 0.00472  | 6775   | 0.00644  |
| 49.00                  | 3310        | 0.00315  | 4687   | 0.00446  |
| 82.20                  | 2087        | 0.00199  | 3379   | 0.00322  |
| 100.14                 | 1838        | 0.00176  | 3643   | 0.00348  |
| 199.18                 | 1452        | 0.00140  | 2013   | 0.00194  |
| 300.0                  | 1071        | 0.00104  | 1777   | 0.00172  |
| 3360                   | 138         | 0.00017  | 159    | 0.00019  |
| 6180                   | 43          | 0.00006  | 69     | 0.00010  |
| 14880                  | 10          | 0.00003  | 12     | 0.00003  |

Animal IA: OG-20140920-P4

| Time post dosing (min) | Whole blood |         | Plasma |          |
|------------------------|-------------|---------|--------|----------|
|                        | Bq/mL*      | %IA/mL  | Bq/mL* | %IA/mL** |
| 1.00                   | 29160       | 0.02581 | 38536  | 0.03410  |
| 1.15                   | 27344       | 0.02420 | 34930  | 0.03092  |
| 2.05                   | 21540       | 0.01907 | 28053  | 0.02483  |
| 5.05                   | 13905       | 0.01231 | 18353  | 0.01625  |
| 10.02                  | 8458        | 0.00749 | 11094  | 0.00983  |
| 19.58                  | 5007        | 0.00444 | 6540   | 0.00580  |
| 29.48                  | 3651        | 0.00324 | 4878   | 0.00433  |
| 49.55                  | 2713        | 0.00241 | 3450   | 0.00306  |
| 74.56                  | 2058        | 0.00183 | 2641   | 0.00235  |
| 99.45                  | 1673        | 0.00149 | 2136   | 0.00190  |
| 225.0                  | 1085        | 0.00098 | 1447   | 0.00130  |
| 300.0                  | 829         | 0.00075 | 1102   | 0.00100  |
| 3360                   | 168         | 0.00019 | 202    | 0.00023  |
| 6180                   | 93          | 0.00013 | 122    | 0.00017  |
| 14880                  | 11          | 0.00003 | 12     | 0.00003  |

\* decay-corrected to the time of sampling

\*\* %IA/mL denotes percentage injected activity per volume of blood

Animal IA: OG-20140920-P5

| Time post dosing (min) | Whole blood |          | Plasma  |          |
|------------------------|-------------|----------|---------|----------|
|                        | Bq/mL*      | %IA/mL** | Bq/mL * | %IA/mL** |
| 0.40                   | 43410       | 0.04476  | 68287   | 0.07040  |
| 0.57                   | 31774       | 0.03276  | 48412   | 0.04991  |
| 1.56                   | 14945       | 0.01541  | 29290   | 0.03020  |
| 4.58                   | 8304        | 0.00856  | 13910   | 0.01435  |
| 10.49                  | 6029        | 0.00622  | 8459    | 0.00873  |
| 20.06                  | 3825        | 0.00395  | 5395    | 0.00557  |
| 29.22                  | 2821        | 0.00291  | 4134    | 0.00427  |
| 49.44                  | 1827        | 0.00189  | 2756    | 0.00285  |
| 76.00                  | 1499        | 0.00155  | 2036    | 0.00211  |
| 100.0                  | 1138        | 0.00118  | 1726    | 0.00179  |
| 206.1                  | 758         | 0.00079  | 1161    | 0.00121  |
| 293.0                  | 574         | 0.00060  | 835     | 0.00088  |
| 3360                   | 127         | 0.00016  | 171     | 0.00022  |
| 6000                   | 72          | 0.00012  | 105     | 0.00017  |
| 14700                  | 12          | 0.00004  | 14      | 0.00004  |

\* decay-corrected to the time of sampling

\*\* %IA/mL denotes percentage injected activity per volume of blood

Supplementary Table 2. Plasma metabolites analysis results

| Animal IA | Nominal sampling time | Radiochemical purity (HPLC) |
|-----------|-----------------------|-----------------------------|
| Pig 1     | 5 min                 | 97.4%                       |
|           | 30 min                | -                           |
|           | 50 min                | 96.6%                       |
|           | 100 min               | 97.8%                       |
|           | 200 min               | -                           |
|           | 300 min               | 96.7%                       |
|           | 2 h                   | 96.5%                       |
|           | 4 h                   | 95.6%                       |
|           | 6 h                   | 99.0%                       |
|           | 12 h                  | 98.8%                       |
| Pig 2     | 5 min                 | 98.9%                       |
|           | 30 min                | 97.5%                       |
|           | 50 min                | -                           |
|           | 100 min               | 94.8%                       |
|           | 200 min               | 96.5%                       |
|           | 300 min               | 96.7%                       |
|           | 2 h                   | 98.0%                       |
|           | 4 h                   | 99.7%                       |
|           | 6 h                   | 98.5%                       |
|           | 12 h                  | 99.1%                       |
| Pig 3     | 5 min                 | 100%                        |
|           | 30 min                | 100%                        |
|           | 50 min                | 100%                        |
|           | 100 min               | 100%                        |
|           | 200 min               | 100%                        |
|           | 300 min               | 100%                        |
|           | 2 h                   | 99.9%                       |
|           | 4 h                   | 100%                        |
|           | 10 h                  | 100%                        |

|       |         |       |
|-------|---------|-------|
| Pig 4 | 5 min   | 100%  |
|       | 30 min  | 100%  |
|       | 50 min  | 100%  |
|       | 100 min | 100%  |
|       | 200 min | 100%  |
|       | 300 min | 100%  |
|       | 2 h     | 100%  |
|       | 4 h     | 100%  |
|       | 10 h    | 98.5% |

---

|       |         |       |
|-------|---------|-------|
| Pig 5 | 5 min   | 100%  |
|       | 30 min  | 100%  |
|       | 50 min  | 100%  |
|       | 100 min | 100%  |
|       | 200 min | 99.8% |
|       | 300 min | 100%  |
|       | 2 h     | 99.9% |
|       | 4 h     | 99.9% |
|       | 10 h    | 99.9% |

---

The results of denatured plasma samples were analyzed by HPLC for the detection of radioactive metabolites.

Supplementary Table 3. Organ uptake values

| Time<br>h    | WB<br>%IA | Liver<br>%IA | R. Kidney<br>%IA | L. Kidney<br>%IA | Bladder<br>%IA | Heart<br>%IA | Spine<br>%IA |
|--------------|-----------|--------------|------------------|------------------|----------------|--------------|--------------|
| <b>Pig 1</b> |           |              |                  |                  |                |              |              |
| 0.7          | 100.000   | 6.981        | 1.999            | 2.582            | 0.223          | 0.883        | 3.047        |
| 1.9          | 96.343    | 6.767        | 2.515            | 2.922            | 0.368          | 1.151        | 3.431        |
| 3.0          | 95.535    | 6.725        | 2.700            | 3.150            | 0.690          | 0.804        | 3.439        |
| 54.0         | 50.974    | 2.646        | 2.780            | 2.796            | 1.046          | 0.287        | 2.157        |
| 101.4        | 29.934    | 1.707        | 1.775            | 1.772            | 0.000          | 0.207        | 1.448        |
| 148.9        | 18.522    | 1.114        | 1.142            | 1.108            | 0.210          | 0.099        | 1.021        |
| 293.7        | 2.414     | 0.021        | 0.434            | 0.352            | 0.000          | 0.000        | 0.002        |
| <b>Pig2</b>  |           |              |                  |                  |                |              |              |
| 0.5          | 100.000   | 3.211        | 1.914            | 2.245            | 2.793          | 0.680        | 3.544        |
| 1.6          | 86.080    | 2.963        | 2.230            | 2.602            | 1.361          | 0.477        | 3.779        |
| 4.5          | 86.334    | 2.741        | 2.356            | 2.653            | 1.265          | 0.504        | 4.208        |
| 51.6         | 45.575    | 2.260        | 1.988            | 2.210            | 0.005          | 0.304        | 2.543        |
| 99.1         | 27.356    | 1.298        | 1.277            | 1.519            | 0.010          | 0.190        | 1.414        |
| 146.3        | 17.888    | 0.817        | 0.851            | 0.977            | 0.083          | 0.117        | 1.163        |
| 242.5        | 2.315     | 0.034        | 0.261            | 0.309            | 0.000          | 0.007        | 0.069        |
| <b>Pig3</b>  |           |              |                  |                  |                |              |              |
| 0.9          | 100.000   | 4.377        | 1.104            | 2.118            | 0.063          | 1.232        | 2.280        |
| 2.0          | 79.024    | 3.774        | 1.353            | 2.307            | 0.065          | 1.035        | 2.413        |
| 3.8          | 77.890    | 3.021        | 1.929            | 3.653            | 0.015          | 0.804        | 3.198        |
| 56.6         | 34.342    | 1.297        | 2.052            | 2.477            | 0.029          | 0.187        | 1.375        |
| 102.9        | 19.963    | 0.976        | 1.226            | 1.569            | 0.001          | 0.086        | 0.909        |
| 248.1        | 2.778     | 0.112        | 0.332            | 0.364            | 0.000          | 0.000        | 0.065        |
| <b>Pig4</b>  |           |              |                  |                  |                |              |              |
| 0.5          | 96.283    | 7.869        | 2.944            | 2.698            | 8.604          | 0.685        | 2.181        |
| 1.7          | 98.664    | 7.652        | 3.223            | 3.067            | 14.207         | 0.471        | 2.396        |
| 2.8          | 100.000   | 7.346        | 3.454            | 3.255            | 16.182         | 0.391        | 2.513        |
| 54.6         | 42.530    | 2.056        | 2.445            | 3.838            | 0.610          | 0.191        | 1.925        |
| 103.0        | 25.839    | 1.356        | 1.645            | 1.582            | 0.461          | 0.099        | 1.007        |
| 248.2        | 4.029     | 0.171        | 0.490            | 0.487            | 0.002          | 0.002        | 0.164        |
| <b>Pig5</b>  |           |              |                  |                  |                |              |              |
| 0.6          | 100.000   | 7.507        | 1.720            | 1.589            | 0.104          | 0.716        | 2.739        |
| 1.8          | 91.449    | 7.596        | 1.853            | 1.754            | 0.055          | 0.648        | 3.467        |
| 3.0          | 89.169    | 7.531        | 2.064            | 1.850            | 0.042          | 0.541        | 3.389        |
| 50.7         | 46.296    | 1.932        | 1.615            | 2.234            | 0.627          | 0.244        | 2.478        |
| 101.0        | 28.021    | 1.618        | 0.977            | 1.007            | 0.200          | 0.189        | 1.476        |
| 245.5        | 5.751     | 0.442        | 0.355            | 0.292            | 0.000          | 0.028        | 0.434        |
